# Supplementary material for: Cortical dopamine D5 receptors regulate neuronal circuit oscillatory activity and memory in rats
Source: PubMed Central journal article supplement (PMC10401150; doi:10.1111/cns.14210), 2023-04-19
Supplement: CNS-29-2469-s001.pdf [file CNS-29-2469-s001.pdf]

## shRNAmir Screening/Validation

**Gene Name:** rat DRD5      rat DRD1  
**RefSeq#**      NM\_012768      NM\_012546

| shRNAmir Vector      | KD % | KD % | shRNAmir sequence                                                    |
|----------------------|------|------|----------------------------------------------------------------------|
| Empty Vector control | 0%   | 0%   |                                                                      |
| Scramble shRNA       | 25%  | 14%  | GCT GAAATGTACTGCGCGTGGAGACGTTTTGGCCACTGACTGACGTCTCCACGCAGTACATTT     |
| rDRD5-shmir#1 **     | 85%  | 24%  | GCT GAAACCAGACGAATATGTCGAAGTTTTGGCCACTGACTGACTTCGACATTGCTGGTTT CAG   |
| rDRD5-shmir#2        | 70%  | 32%  | GCT GTACTGATGTTTACCGTCTGCAGTTTTGGCCACTGACTGACTGCAGACGAAACATCAGTA CAG |
| rDRD5-shmir#3        | 84%  | 41%  | GCT GATCATGTGGACATAGGCAGTAGTTTTGGCCACTGACTGACTACTGCCTGTCCACATGAT CAG |
| rDRD5-shmir#4        | 36%  | 33%  | GCT GATTAGGAGAGTCAGGAGGCCTGTTTTGGCCACTGACTGACAGGCCTCCACTCTCCTAAT CAG |

\*\* will be used for viral production

Note:

shRNAmir155 sequence Scheme

GCT-target-GTTT TGGCCACTGAC TGAC -antisense- CAG

Promoter

CAG

Vector Backbone

AAV-CAG-GFP-shRNAmir155

**Figure S1.** Comparison of the efficacy of different rDRD5-shRNAmir constructs on the suppression of DRD5 and DRD1 mRNA expression. shRNAmir #1 showed the best DRD5 mRNA knockdown rate at 85% with the lowest impact on DRD1 gene expression at 24%. Validation of knockdown for each shRNA was performed in HEK 293 cells by co-transfection of the shRNA plasmid with the appropriate DRD cDNA plasmid and using the luciferase reporter assay.
